# Supplementary material
Source: PubMed Central journal article supplement (PMC4542239)
Supplement: AEM.01448-15_zam019156557so1.pdf [file AEM.01448-15_zam019156557so1.pdf]

# **Development of a Recombinant *Escherichia coli* strain for Overproduction of Plant Pigment, Anthocyanin**

Chin Giaw Lim<sup>a,1</sup>, Lynn Wong<sup>a,b,1</sup>, Namita Bhan<sup>b</sup>, Hila Dvora<sup>a</sup>, Peng Xu<sup>a,b</sup>, Sankaranarayanan Venkiteswaran<sup>a</sup>, and Mattheos A.G. Koffas<sup>a,b†</sup>

<sup>a</sup>**Department of Chemical and Biological Engineering,  
University at Buffalo, the State University of New York  
Buffalo, NY 14260**

<sup>b</sup>**Department of Chemical and Biological Engineering and  
Center for Biotechnology and Interdisciplinary Studies,  
Rensselaer Polytechnic Institute, Troy, NY 12180**

**Submitted for publication to Applied and Environmental  
Microbiology**

<sup>1</sup>C.G.L. and L.W. contributed equally to this work

<sup>†</sup> Corresponding author

## **Supplementary Information**

### **Content**

1. Supplementary Figure S1.
2. Supplementary Figure S2.
3. Supplementary Figure S3.
4. Supplementary Figure S4.

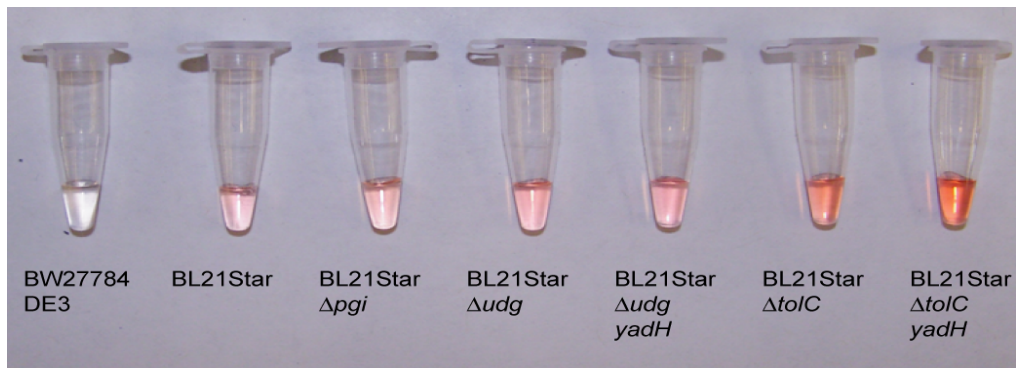

**Figure S1. Cyanidin 3-O-glucoside (C3G) concentration depicted in color intensities of different background strains harboring anthocyanin pathway enzymes in fusion construct and overexpression of UDP glucose pathway enzymes.** Combining 2 modifications of *e. coli* efflux pumps: *tolC* knockout preventing the efflux of catechin and *yadH* overexpression facilitating the efflux of C3G, resulted in a strain with highest C3G production.

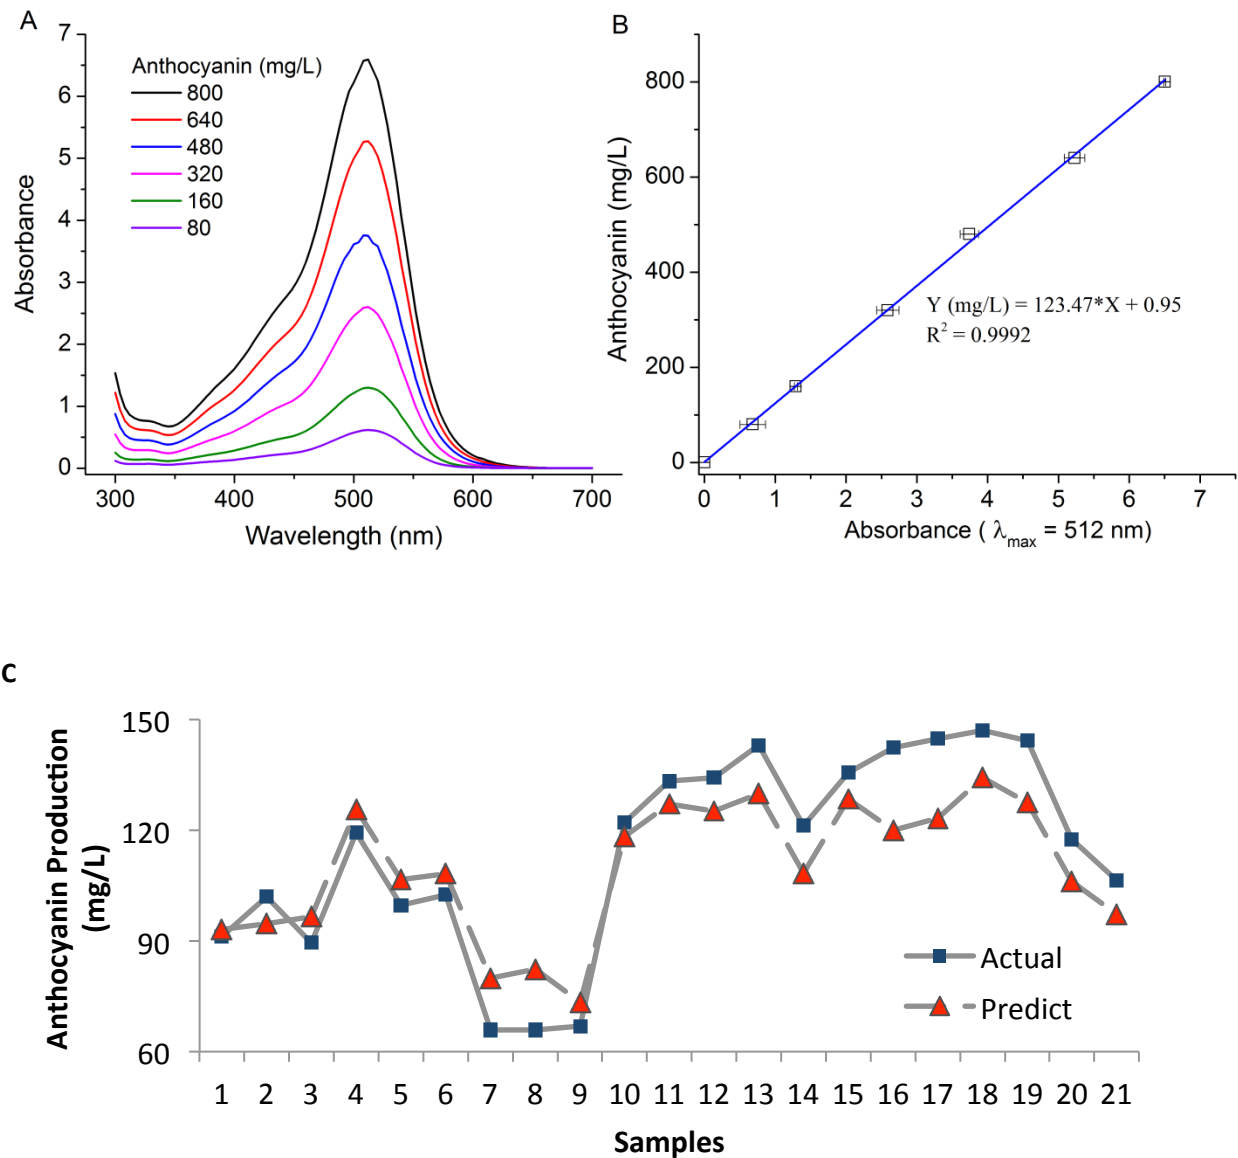

**Figure S2. Cyanidin 3-O-glucoside (C3G) colorimetric assay development. (A,B)** C3G calibration curve measured from 80mg/L to 800mg/L at an absorbance of 512nm. **(C)** Comparing predicted titers of C3G using calibration curve to the actual production measured using HPLC of 21 different samples.

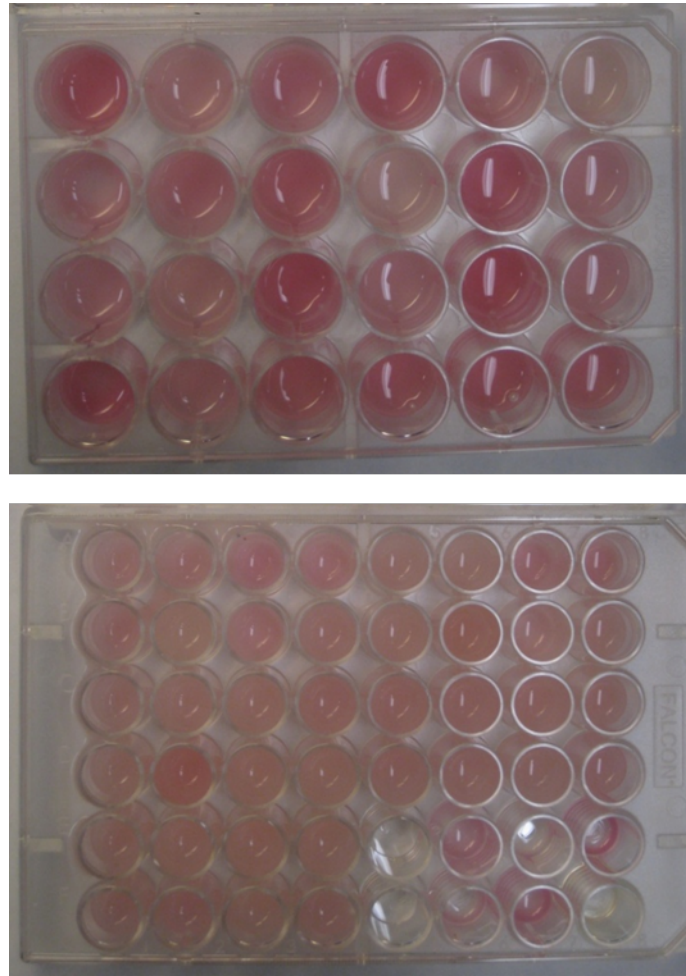

**Figure S3. Examples of 24- and 48-well plates used for fermentation parameters optimization.** Parameters optimized include induction OD, IPTG, sodium ascorbate, 2-oxoglutarate, orotic acid and glutamate concentrations.

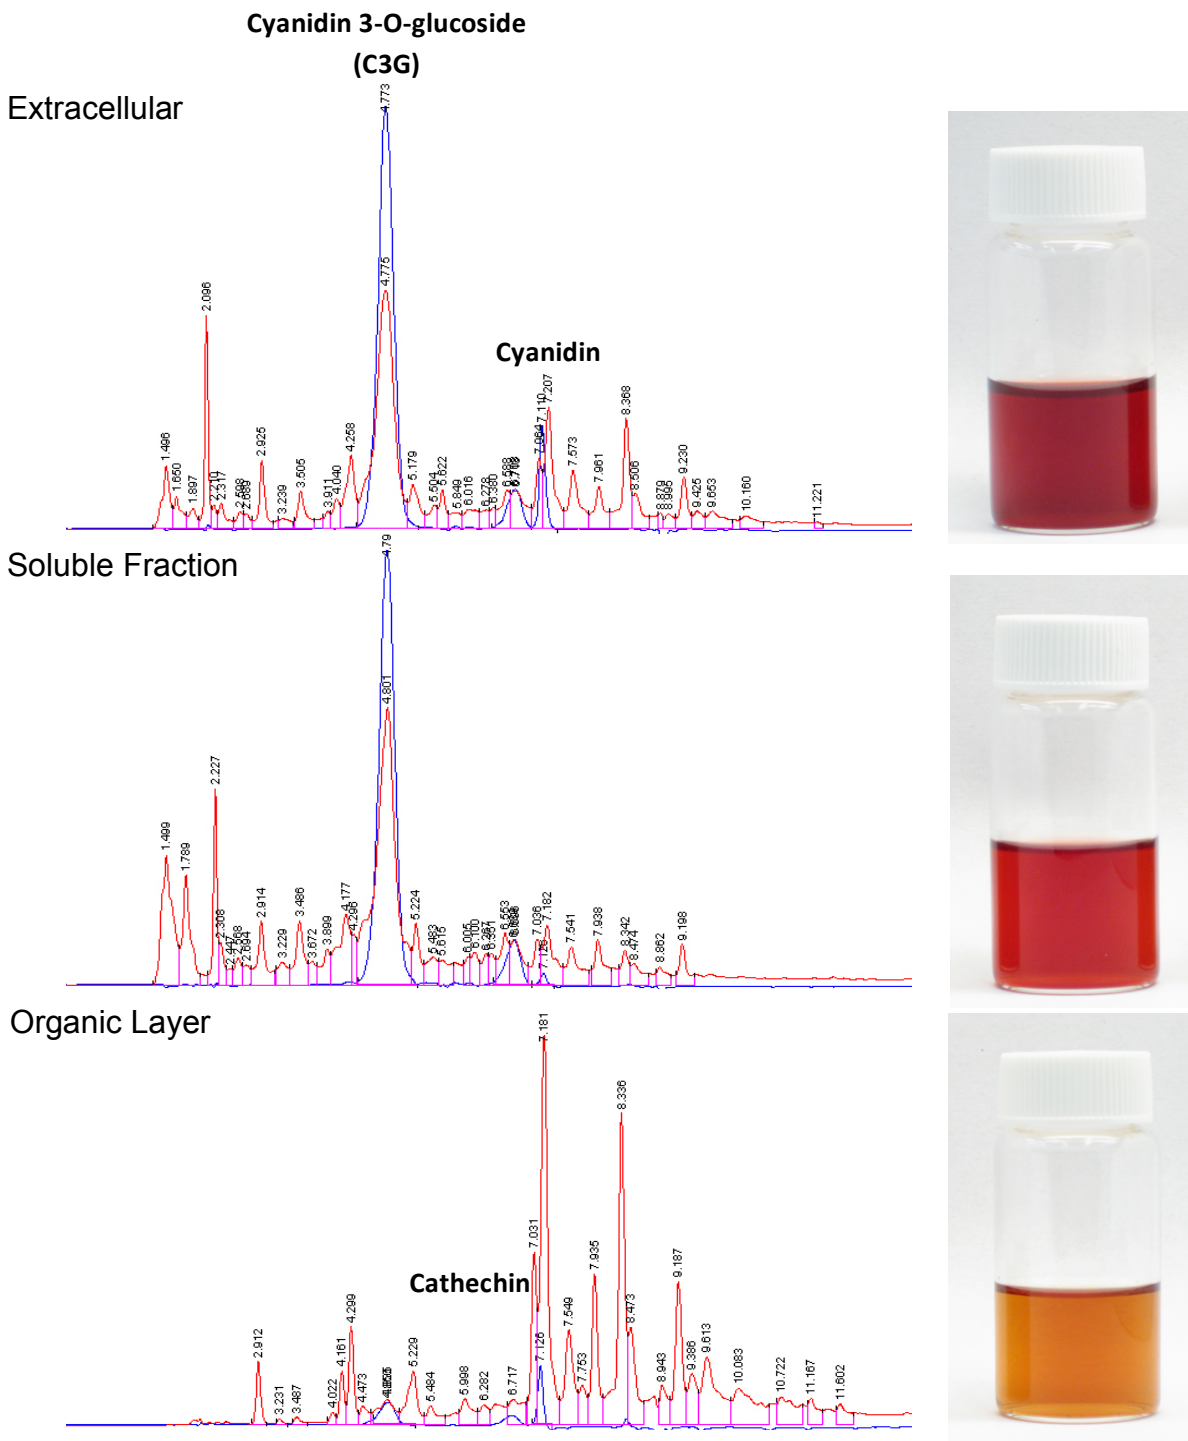

**Figure S4. HPLC chromatogram of cell culture before and after extraction with ethyl acetate.** After extraction, C3G remained mostly in the soluble fraction while most of the cyanidin and unknown hydrophobic compounds including catechin were extracted into the organic layer.
